# Supplementary material for: Modulating molecular plasmons in naphthalene via intermolecular interactions and strong light–matter coupling
Source: Royal Society of Chemistry journal article supplement (doi:10.1039/d4cp01816h), 2024-01-01
Supplement: d4cp01816h1.pdf [file d4cp01816h1.pdf]

**Supplementary Information:**

**Modulating Molecular Plasmons in Naphthalene**

**via Intermolecular Interactions and Strong**

**Light-Matter Coupling**

Zhen Liu <sup>\*a</sup> and Xiao Wang <sup>\*a</sup>

<sup>a</sup> Department of Chemistry and Biochemistry, University of California Santa Cruz, Santa Cruz,  
CA 95064 USA.

\*Email: [zliu373@ucsc.edu](mailto:zliu373@ucsc.edu); [xwang431@ucsc.edu](mailto:xwang431@ucsc.edu)

**Table S1.** Atomic coordinates (in Å) of naphthalene monomer optimized at the B3LYP/cc-pVDZ level of theory.

|   |           |           |          |
|---|-----------|-----------|----------|
| H | 3.361137  | -1.238078 | 0.000000 |
| C | 2.411654  | -0.699292 | 0.000000 |
| H | 1.237065  | -2.480854 | 0.000000 |
| C | 1.232905  | -1.388655 | 0.000000 |
| C | 1.232905  | 1.388655  | 0.000000 |
| C | 0.000000  | -0.712406 | 0.000000 |
| C | 2.411654  | 0.699292  | 0.000000 |
| C | 0.000000  | 0.712406  | 0.000000 |
| C | -1.232905 | -1.388655 | 0.000000 |
| H | 3.361137  | 1.238078  | 0.000000 |
| H | -1.237065 | 2.480854  | 0.000000 |
| H | 1.237065  | 2.480854  | 0.000000 |
| C | -2.411654 | -0.699292 | 0.000000 |
| H | -1.237065 | -2.480854 | 0.000000 |
| H | -3.361137 | -1.238078 | 0.000000 |
| C | -2.411654 | 0.699292  | 0.000000 |
| H | -3.361137 | 1.238078  | 0.000000 |
| C | -1.232905 | 1.388655  | 0.000000 |

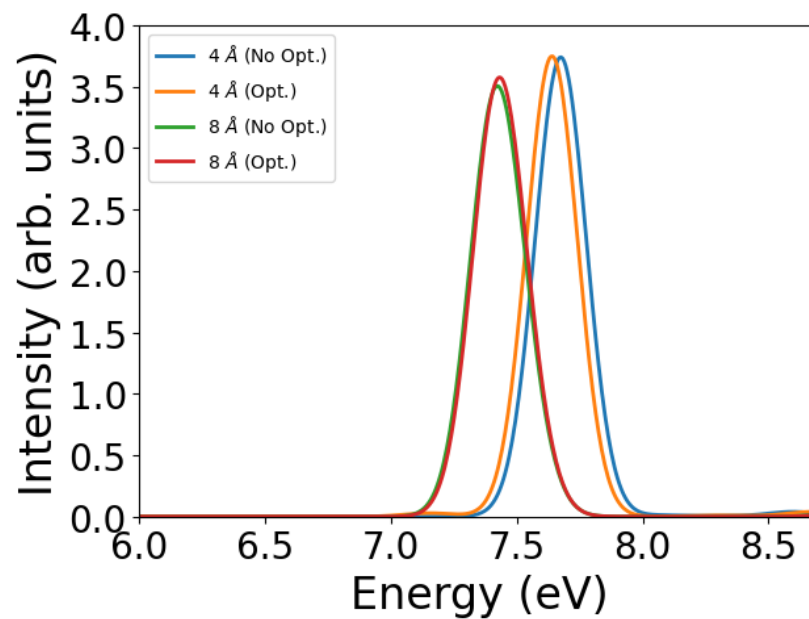

**Figure S1.** Absorption spectra of naphthalene dimer at intermolecular distances of 4 Å and 8 Å along the z direction, comparing optimized and unoptimized geometries at the dimer level; the monomer geometry has been pre-optimized using B3LYP/cc-pVDZ.
